# Supplementary material for: Case Report: Progressive Cholestasis: Severe Phenotype of MEGDEL Syndrome With SATB2-Associated Syndrome
Source: Front Pediatr. 2021 Oct 1;9:713458. doi: 10.3389/fped.2021.713458 (PMC8517520; doi:10.3389/fped.2021.713458)
Supplement: Supplementary file 1 [file Table_1.xlsx]

## Sheet: Sheet1
SERAC1	c.227_228dupAT
Pathogenic
PVS1	Null variant in a gene where loss of function is a known mechanism of disease
	Null variant (frameshift indel):
	Loss of function is a known mechanism of disease: 23 pathogenic null variants were reported in ClinVar for this gene (chr6:158571548:G>A, chr6:158571484:C>CCATG, chr6:158571521:C>CAT, chr6:158569940:TTTTC>T...), across 13 different exons, of which 3 variants in this exon (4) gnomAD observed/expected score 0.626 Coding strand: reverse strand
	Predicted to undergo NMD, not located in last exon or last 50bp of preliminary exon. Coding exon number 3 out of 16 coding exons (4 out of total exons)
PM2	Allele frequency is extremely low in all databases. Recommended PM2 frequency threshold for gene: 0.05% Allele frequencies are:
	gnomAD maximal non founder subpopulations frequency: 0.0%
	gnomAD maximal founder subpopulations frequency: 0.0%
	Note: recommended PM2 frequency threshold for gene: 0.05% Most frequent known pathogenic variants in gene are: chr6:158541464:G>A, frequency: 0.023% chr6:158567859:G>A, frequency: 0.016% chr6:158538811:C>CAGAT, frequency: 0.016%
	Note: founder populations in gnomAD including Ashkenazi Jewish and Finnish were assigned a higher threshold with at least 1%
PP5	Reputable source recently reports variant as pathogenic, but the evidence is not available to the laboratory to perform an independent evaluation
	By Clinvar ClinVar IDs: 280568 Number of submissions: 1 pathogenic Number of submissions from 2015 and above: 1 pathogenic Number of submissions before 2015: 0 Latest submissions: 4/2016, pathogenic, SCV000330494, RCV000305199
SERAC1	c.1502-1G>C
Likely Pathogenic
PVS1	Null variant in a gene where loss of function is a known mechanism of disease
	Null variant (acceptor site):
	Loss of function is a known mechanism of disease: 23 pathogenic null variants were reported in ClinVar for this gene (chr6:158535875:C>CAG, chr6:158535858:A>AAGAT, chr6:158569940:TTTTC>T, chr6:158571484:C>CCATG...), across 13 different exons, of which 2 variants in this exon (15) gnomAD observed/expected score 0.626 Coding strand: reverse strand
	Exon skipping disrupts reading frame
	Altered region is critical to protein function Number of pathogenic non-nonsense variants in skipped exon: 1
	Variant removes more than 10% of transcript (10.0% of transcript.)
PM2	Extremely low frequency in gnomad population databases
	Allele frequency is extremely low in all databases. Recommended PM2 frequency threshold for gene: 0.05% Allele frequencies are:
	gnomAD maximal non founder subpopulations frequency: 0.0%
	gnomAD maximal founder subpopulations frequency: 0.0%
	Note: recommended PM2 frequency threshold for gene: 0.05% Most frequent known pathogenic variants in gene are: chr6:158541464:G>A, frequency: 0.023% chr6:158567859:G>A, frequency: 0.016% chr6:158538811:C>CAGAT, frequency: 0.016%
SATB2	c.1166G>A(p.R389H)
Likely Pathogenic
PM2	Extremely low frequency in gnomad population databases
	Allele frequency is extremely low in all databases. Recommended PM2 frequency threshold for gene: 0.05% Allele frequencies are:
	gnomAD maximal non founder subpopulations frequency: 0.0%
	gnomAD maximal founder subpopulations frequency: 0.0%
	Note: recommended PM2 frequency threshold for gene: 0.05% Most frequent known pathogenic variants in gene are: chr2:200188552:C>CT, frequency: 0.0% chr2:200213750:G>A, frequency: 0.0% chr2:200193620:T>C, frequency: 0.0%
	Note: founder populations in gnomAD including Ashkenazi Jewish and Finnish were assigned a higher threshold with at least 1%
PM5	Different amino acid change as a known pathogenic variant
	Missense variant
	Same codon with a different amino acid change was found in:
	High certainty ClinVar pathogenic variants. Clinvar IDs: chr2:200213432:G>A
PM6	De novo in a patient with phenotype consistency, no family history and both maternity and paternity are assumed.
